# Supplementary material for: Oxidative Stress and DNA Damage Markers in Colorectal Cancer
Source: MDPI journal article supplement (doi:10.3390/ijms231911664), 2022-10-01

**Supplementary Table S1.** Study of biochemical, inflammation, anemia and tumor markers in CRC patients according to tumor stages.

| Variable                                        | Stage 0                | Stage 1                 | Stage 2                  | <i>p</i> -value |
|-------------------------------------------------|------------------------|-------------------------|--------------------------|-----------------|
| <i>Biochemical markers</i>                      |                        |                         |                          |                 |
| Glucose (mg/dL)                                 | 115.3±28.9             | 117.8±37.5              | 122.9±55.8               | 0.835           |
| Total cholesterol (mg/dL)                       | 181.3±37.1             | 179.9±45.5              | 183.5±26.1               | 0.972           |
| HDL cholesterol (mg/dL)                         | 44.0±11.1              | 43.1±10.7               | 40.6±10.4                | 0.709           |
| LDL cholesterol (mg/dL)                         | 114.7±33.4             | 115.0±38.1              | 115.3±34.7               | 0.999           |
| Uric acid (mg/dL)                               | 5.57±1.67              | 5.09±1.53               | 4.94±2.28                | 0.402           |
| Albumin (g/dL)                                  | 4.23±0.57              | 4.14±0.33               | 4.16±0.32                | 0.725           |
| <i>Inflammation markers</i>                     |                        |                         |                          |                 |
| IL-6 (pg/mL)                                    | 14.0±20.3              | 28.5±34.1               | 20.7±20.4                | 0.079           |
| CRP (mg/L)                                      | 6.61±3.76              | 16.6±38.6               | 15.6±12.7                | 0.189           |
| Leukocytes (x10 <sup>3</sup> /mm <sup>3</sup> ) | 7.37±1.76              | 7.98±1.56               | 8.55±2.05                | 0.123           |
| Neutrophils (%)                                 | 62.9±7.64              | 62.4±9.33               | 64.5±8.45                | 0.835           |
| N/L (-)                                         | 2.53±0.82              | 2.80±2.49               | 3.09±1.41                | 0.618           |
| Platelets (x10 <sup>5</sup> /mm <sup>3</sup> )  | 242.0±66.1             | 273.5±87.7              | 253.4±54.7               | 0.217           |
| Fibrinogen (mg/dL)                              | 465.3±90.8             | 504.8±107.2             | 514.0±133.7              | 0.195           |
| <i>Anemia markers</i>                           |                        |                         |                          |                 |
| Hemoglobin (g/dL)                               | 12.4±1.96              | 12.1±1.80               | 11.7±1.40                | 0.647           |
| Hematocrit (%)                                  | 38.0±5.36              | 37.5±5.05               | 36.1±3.41                | 0.623           |
| MCV (fL)                                        | 83.0±9.00              | 84.2±7.89               | 82.3±7.80                | 0.791           |
| Iron (µg/dL)                                    | 61.4±46.6              | 52.9±32.6               | 43.9±25.2                | 0.448           |
| Transferrin (mg/dL)                             | 287.0±48.8             | 290.4±52.6              | 313.9±63.9               | 0.407           |
| TSI (%)                                         | 17.5±12.7              | 14.7±8.68               | 12.0±7.37                | 0.332           |
| Ferritin (µg/L)                                 | 45.2±50.6 <sup>a</sup> | 63.6±100.2 <sup>a</sup> | 207.0±396.6 <sup>b</sup> | 0.014           |
| <i>Tumor markers</i>                            |                        |                         |                          |                 |
| CEA (ng/mL)                                     | 6.65±11.2              | 7.47±10.5               | 14.0±13.2                | 0.380           |
| CA 19.9 (IU/mL)                                 | 23.5±30.1 <sup>a</sup> | 22.1±10.5 <sup>a</sup>  | 106.7±169.8 <sup>b</sup> | 0.003           |

Data are expressed as mean ± standard deviation. Values with different superscript letters (**a**, **b**) were significantly different when the 3 groups were compared by one-way ANOVA followed by a Student–Newman-Keuls post hoc test. IL-6: Interleukin 6; CRP: C-reactive protein; N/L: neutrophil/lymphocyte ratio; MCV: mean corpuscular volume; TSI: transferrin saturation index; CEA: carcinoembryonic antigen; CA 19.9: carbohydrate antigen 19.9.

**Supplementary Figure S1.** Flow chart of the study protocol.

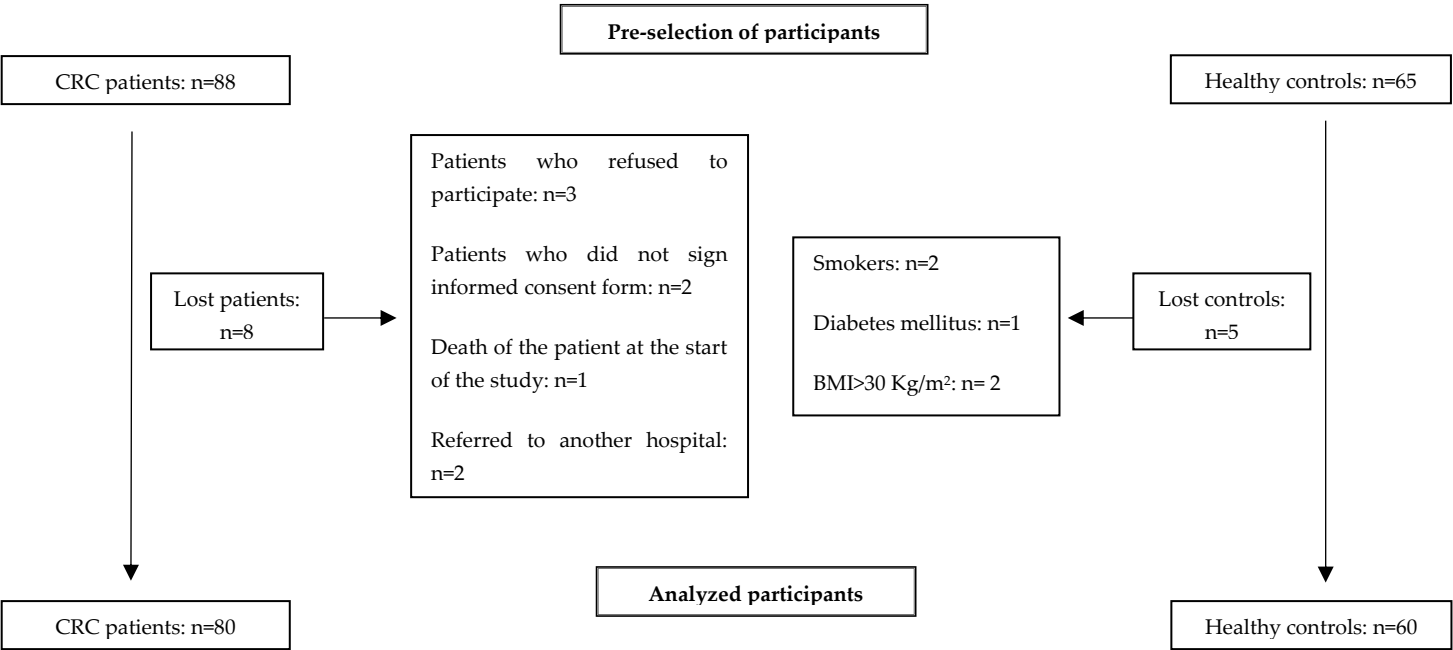

Supplement: s1 [file s1]
